# Supplementary material for: Consistent satellite XCO 2 retrievals from SCIAMACHY and GOSAT using the BESD algorithm
Source: Copernicus journal article supplement (doi:10.5194/amt-8-2961-2015), 2015-07-24
Supplement: Supplementary file 1 [file amt-8-2961-2015-supplement.pdf]

Supplement of Atmos. Meas. Tech., 8, 2961–2980, 2015  
<http://www.atmos-meas-tech.net/8/2961/2015/>  
doi:10.5194/amt-8-2961-2015-supplement  
© Author(s) 2015. CC Attribution 3.0 License.

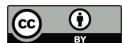

*Supplement of*

## **Consistent satellite XCO<sub>2</sub> retrievals from SCIAMACHY and GOSAT using the BESD algorithm**

**J. Heymann et al.**

*Correspondence to:* J. Heymann (heymann@iup.physik.uni-bremen.de)

The copyright of individual parts of the supplement might differ from the CC-BY 3.0 licence.

**Table S1.** Comparison of the validation results against TCCON using three different collocation criteria, the  $10^\circ \times 10^\circ$  box around a TCCON site, a  $5^\circ$  radius and a 350 km radius. Shown are the statistical summary values: (i) the mean of the mean differences to TCCON (offset,  $\bar{\Delta}$ ), (ii) the standard deviation of the mean differences (estimated station-to-station bias, SD  $\Delta$ ), (iii) the mean of the standard deviation of the difference (estimated single measurement precision,  $\bar{\sigma}$ ), (iv) the mean correlation coefficient ( $\bar{r}$ ) and (v) the number of stations with a sufficient amount of collocations ( $n > 30$ ).

| Collocation method         | GOSAT BESD – Full Dataset |                   |                      |               |         | SCIAMACHY BESD – Full Dataset |                   |                      |               |         |
|----------------------------|---------------------------|-------------------|----------------------|---------------|---------|-------------------------------|-------------------|----------------------|---------------|---------|
|                            | $\bar{\Delta}$ [ppm]      | SD $\Delta$ [ppm] | $\bar{\sigma}$ [ppm] | $\bar{r}$ [-] | $n$ [-] | $\bar{\Delta}$ [ppm]          | SD $\Delta$ [ppm] | $\bar{\sigma}$ [ppm] | $\bar{r}$ [-] | $n$ [-] |
| $10^\circ \times 10^\circ$ | -0.30                     | 0.43              | 2.09                 | 0.79          | 11      | -0.05                         | 0.89              | 2.20                 | 0.78          | 11      |
| $5^\circ$ radius           | -0.27                     | 0.39              | 2.08                 | 0.79          | 11      | -0.05                         | 0.90              | 2.20                 | 0.77          | 11      |
| 350 km radius              | -0.22                     | 0.41              | 1.99                 | 0.80          | 9       | -0.10                         | 0.85              | 2.26                 | 0.74          | 9       |
| Collocation method         | GOSAT BESD – 2010–2011    |                   |                      |               |         | SCIAMACHY BESD – 2010–2011    |                   |                      |               |         |
|                            | $\bar{\Delta}$ [ppm]      | SD $\Delta$ [ppm] | $\bar{\sigma}$ [ppm] | $\bar{r}$ [-] | $n$ [-] | $\bar{\Delta}$ [ppm]          | SD $\Delta$ [ppm] | $\bar{\sigma}$ [ppm] | $\bar{r}$ [-] | $n$ [-] |
| $10^\circ \times 10^\circ$ | -0.42                     | 0.48              | 2.04                 | 0.71          | 11      | -0.08                         | 0.88              | 2.12                 | 0.63          | 11      |
| $5^\circ$ radius           | -0.38                     | 0.44              | 2.05                 | 0.71          | 11      | -0.09                         | 0.86              | 2.12                 | 0.62          | 11      |
| 350 km radius              | -0.39                     | 0.40              | 1.93                 | 0.72          | 9       | -0.20                         | 0.75              | 2.25                 | 0.54          | 9       |

**Table S2.** Same as Tab. S1 but for daily means. The statistical summary values are computed using only stations with more than 10 days of data.

| Collocation method         | GOSAT – TCCON        |                   |                      |               |         | SCIAMACHY – TCCON    |                   |                      |               |         | GOSAT – SCIAMACHY    |                   |                      |               |         |
|----------------------------|----------------------|-------------------|----------------------|---------------|---------|----------------------|-------------------|----------------------|---------------|---------|----------------------|-------------------|----------------------|---------------|---------|
|                            | $\bar{\Delta}$ [ppm] | SD $\Delta$ [ppm] | $\bar{\sigma}$ [ppm] | $\bar{r}$ [-] | $n$ [-] | $\bar{\Delta}$ [ppm] | SD $\Delta$ [ppm] | $\bar{\sigma}$ [ppm] | $\bar{r}$ [-] | $n$ [-] | $\bar{\Delta}$ [ppm] | SD $\Delta$ [ppm] | $\bar{\sigma}$ [ppm] | $\bar{r}$ [-] | $n$ [-] |
| $10^\circ \times 10^\circ$ | -0.17                | 0.54              | 1.28                 | 0.85          | 9       | -0.05                | 0.85              | 1.60                 | 0.73          | 9       | -0.77                | 0.59              | 1.51                 | 0.80          | 9       |
| $5^\circ$ radius           | -0.24                | 0.46              | 1.39                 | 0.85          | 5       | -0.17                | 0.74              | 1.68                 | 0.66          | 5       | -0.38                | 0.40              | 1.60                 | 0.77          | 5       |
| 350 km radius              | -0.34                | 0.11              | 0.96                 | 0.88          | 2       | 0.07                 | 0.71              | 1.51                 | 0.69          | 2       | -0.23                | 0.58              | 1.48                 | 0.72          | 2       |

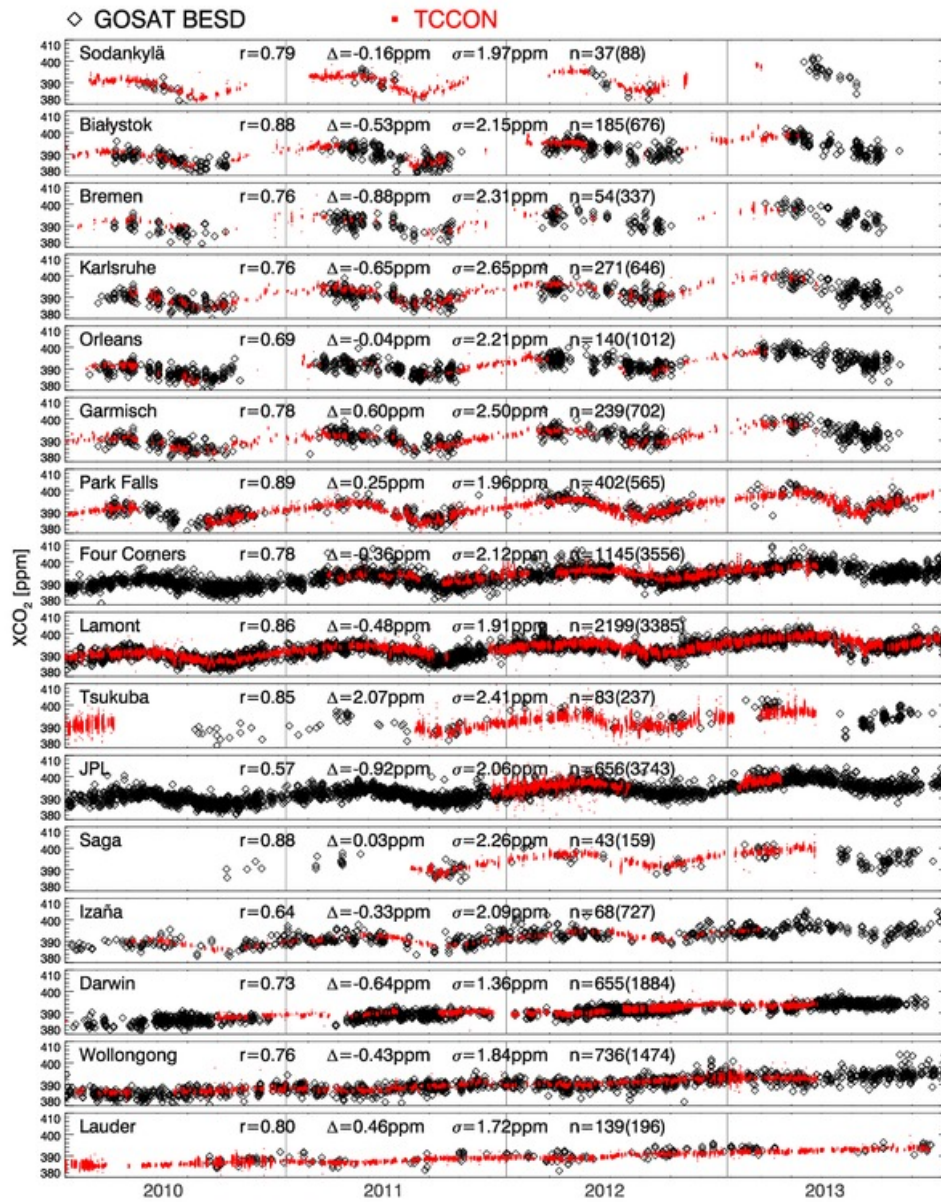

**Figure S1.** GOSAT BESD XCO<sub>2</sub> and TCCON XCO<sub>2</sub> at the chosen TCCON sites. “ $r$ ” is the correlation coefficient, “ $\Delta$ ” is the mean of the difference GOSAT minus TCCON, “ $\sigma$ ” is the standard deviation of the difference and “ $n$ ” the number of collocations ( $\pm 2$  h,  $10^\circ \times 10^\circ$ , in brackets: number of GOSAT measurements with “good” quality). A summary of all values is given in Table 5.

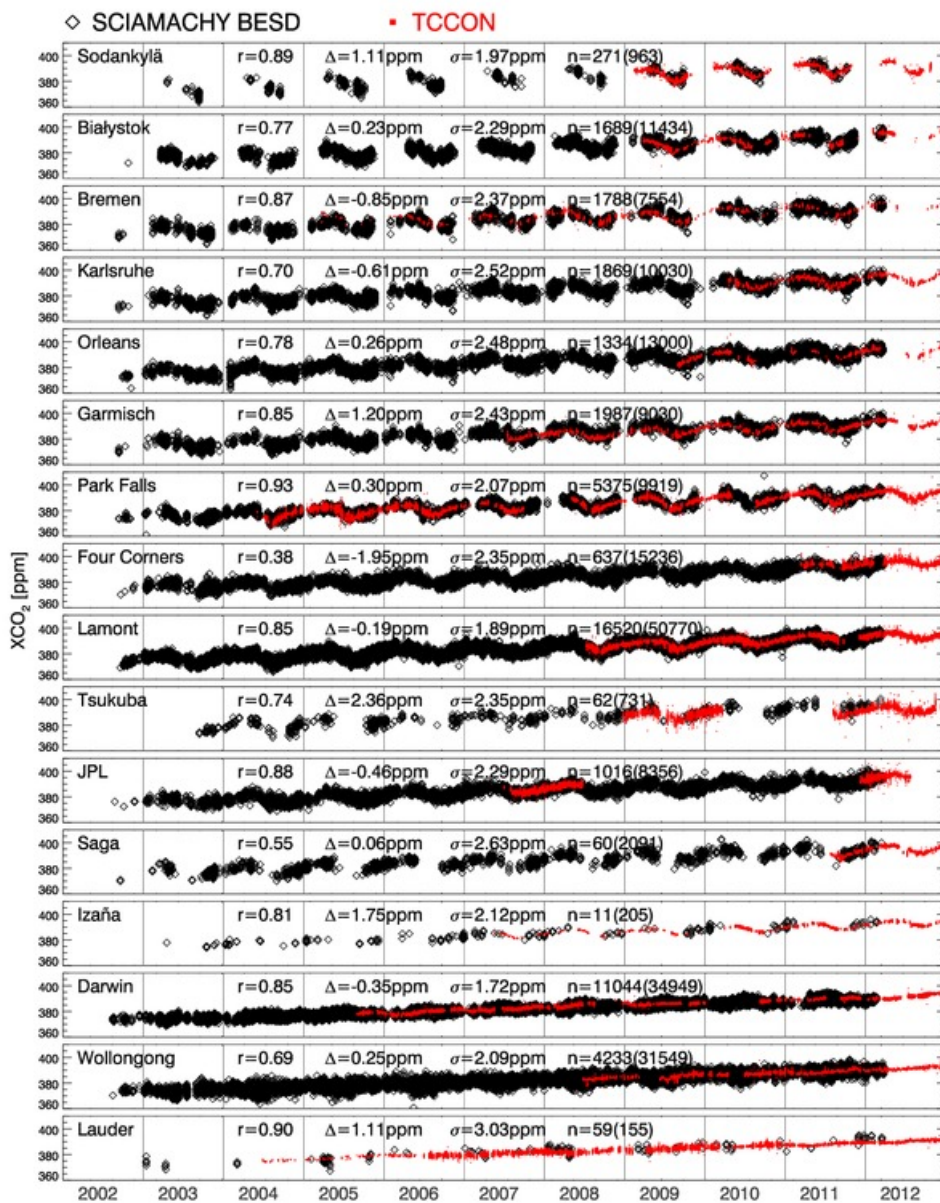

Figure S2. As Fig. S1 but for SCIAMACHY BESD XCO<sub>2</sub>. A summary of all values is given in Table 6.

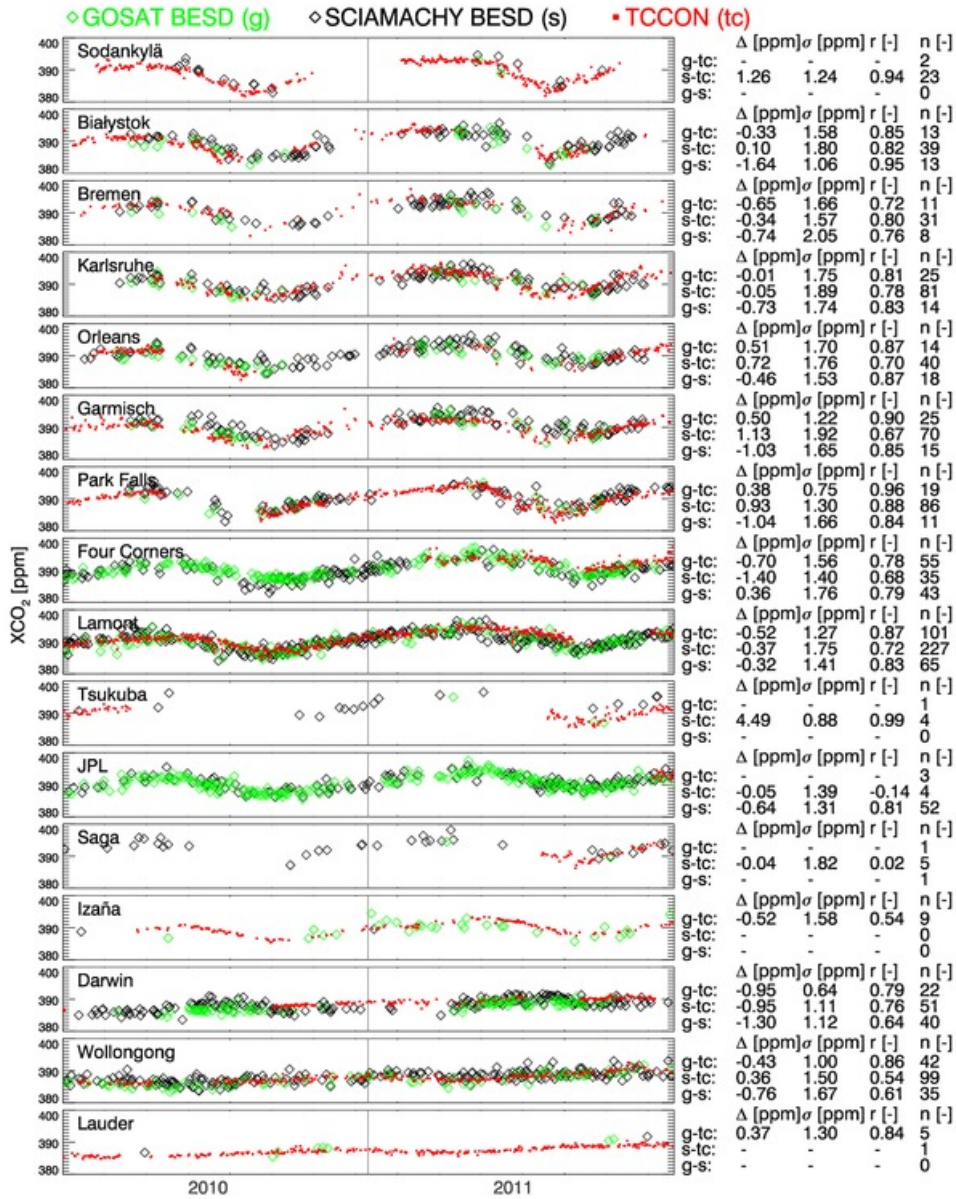

**Figure S3.** Daily averages of GOSAT (g), SCIAMACHY (s) and TCCON (tc) XCO<sub>2</sub> for 2010 and 2011. The values are computed as for Fig. S1 and are summarised in Table 7.
